# Supplementary material
Source: publisher figshare collection journal article supplement (https://frontiersin.figshare.com/ndownloader/files/22089798)
Supplement: Supplementary file 1 [file 22089798]

**Supplementary Table 3.** Results for the generalized linear mixed models (GLMM) ran on the dataset without non-native species including community level metrics (mean and skewness of local and regional trait-based originality and species richness) and the species-specific ratio of trait-based local originality to regional originality.

| Dependent variable                           | Intercept                | Urbanization (U)         | Species richness (SR)    | Year of sampling         | U×SR                      | R <sup>2</sup> <sub>c</sub> | R <sup>2</sup> <sub>m</sub> |
|----------------------------------------------|--------------------------|--------------------------|--------------------------|--------------------------|---------------------------|-----------------------------|-----------------------------|
| Mean local trait-based originality           | 4.7 10 <sup>-1</sup> *** | 6.9 10 <sup>-4</sup> *** | 9.1 10 <sup>-4</sup> *** | -5.810 <sup>-4</sup> *   | -2.3 10 <sup>-5</sup> *** | 0.435                       | 0.119                       |
| Mean regional trait-based originality        | 5.2 10 <sup>-1</sup> *** | 2.4 10 <sup>-4</sup> *** | -5.2 10 <sup>-7</sup> NS | -1.7 10 <sup>-4</sup> *  | -1.0 10 <sup>-5</sup> *** | 0.644                       | 0.083                       |
| Skewness of local trait-based originality    | 1.1 10 <sup>-2</sup> *** | 3.7 10 <sup>-5</sup> NS  | 2.5 10 <sup>-2</sup> *** | -1.5 10 <sup>-3</sup> NS | excluded                  | 0.194                       | 0.120                       |
| Skewness of regional trait-based originality | -3.7 10 <sup>-2</sup> NS | 1.6 10 <sup>-3</sup> *** | 3.1 10 <sup>-2</sup> *** | -9.7 10 <sup>-4</sup> NS | excluded                  | 0.332                       | 0.175                       |
| Species richness                             | 1.9 ***                  | 4.0 10 <sup>-3</sup> *** | omitted                  | -4.0 10 <sup>-3</sup> NS | omitted                   | 3.5 10 <sup>-2</sup>        | 1.7 10 <sup>-3</sup>        |
| Local/regional trait-based originality       | 9.1 10 <sup>-1</sup> *** | 7.4 10 <sup>-4</sup> *** | 1.7 10 <sup>-3</sup> *** | excluded                 | -2.0 10 <sup>-5</sup> *** | 0.450                       | 0.056                       |

Estimated coefficients and their significance are shown for the explanatory variables that remained after backward selection of variables based on Akaike information criterion (AIC) values including urbanization percentage, species richness, interaction (×) between urbanization and species richness and year of sampling. The mention "excluded" means that the explanatory variable was not retained in the final model according to the Akaike criterion, except for the last model on local/regional originality where the year was excluded because of a default of convergence. Conditional and marginal R<sup>2</sup> describes the proportion of variance explained by fixed (R<sup>2</sup><sub>c</sub>) and random+fixed (R<sup>2</sup><sub>m</sub>) covariables. P-values: NS = non-significant (P>0.050); \* = 0.010 < P ≤ 0.050; \*\* = 0.001 < P ≤ 0.010; \*\*\* = P ≤ 0.001.
